# Supplementary material
Source: PubMed Central journal article supplement (PMC3318057)
Supplement: supp_0022034511407918_DS_10.1177_0022034511407918.pdf [file supp_0022034511407918_DS_10.1177_0022034511407918.pdf]

## RESEARCH REPORTS

### Biological

E.L. Scheller<sup>2</sup>, C.M. Baldwin<sup>1</sup>, S. Kuo<sup>4</sup>,  
N.J. D’Silva<sup>1,3</sup>, S.E. Feinberg<sup>4</sup>, P.H. Krebsbach<sup>2</sup>,  
and P.C. Edwards<sup>1\*</sup>

<sup>1</sup>Dept. of Periodontics and Oral Medicine, <sup>2</sup>Dept. of Biologic Materials and Sciences, and <sup>3</sup>Dept. of Pathology, University of Michigan Medical School, Ann Arbor; and <sup>4</sup>Dept. of Oral and Maxillofacial Surgery, School of Dentistry, University of Michigan, 1011 N. University Ave., Ann Arbor, MI 48109, USA; \*corresponding author, paulce@umich.edu

*J Dent Res* DOI: 10.1177/0022034511407918

## APPENDIX

### METHODS

#### Human Tissues

Approval was obtained from the University of Michigan Health Sciences IRB. Biopsies from the archives of the University of Michigan Oral Pathology Biopsy Service accessed between January 2006 and June 2008 were searched for the following key words: “necrotic bone”, “exposed bone”, “bisphosphonate”, “aredia”, “zometa”, “fosamax”, “osteonecrosis”, “myeloma”, “osteomyelitis”, “pamidronate”, “alendronate”, “zoledronate”, or “zoledronic”. After clinical history review, cases were assigned to one of three groups: no BP history (control), ONJ

# Bisphosphonates Inhibit Expression of p63 by Oral Keratinocytes

with oral BP (“Oral-BP”), or ONJ with intravenous BP (“IV-BP”). We examined H&E-stained slides of these cases to ensure that each specimen contained epithelium and connective tissue. Histologic identification of non-viable bone with associated bacterial colonies was also required. Nine control and 10 bisphosphonate cases (5 Oral-BP, 5 IV-BP) were identified (Appendix Table 1).

#### NOK-SI Cell Proliferation

Cell proliferation was measured after overnight plating in 48-well plates (Time 0) by incubation with AQueous One Cell Proliferation Assay solution (Promega:G3580, Madison, WI, USA) for 1.5 hrs and measurement of absorbance at 490 nm.

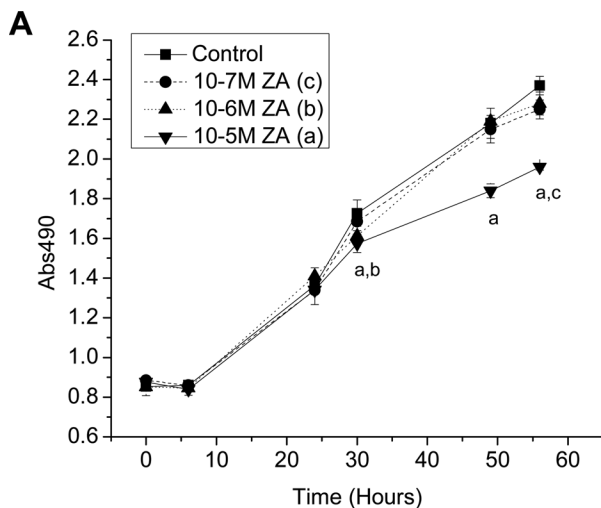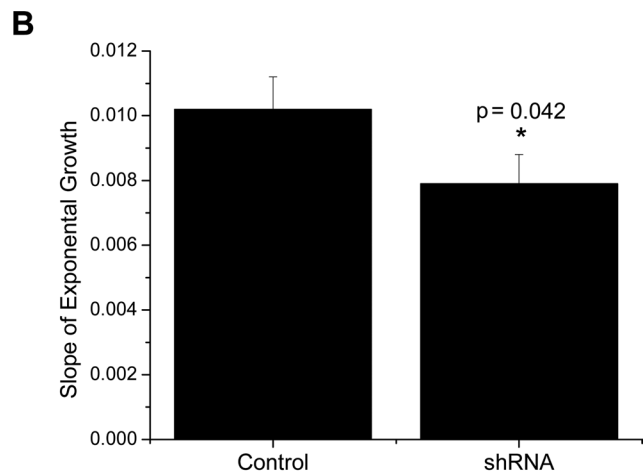

**Appendix Figure. (A)** Proliferation defects at all time-points from 30 hrs on appeared only in the 10<sup>-5</sup> M ZA group. However, proliferation decreases were also noted with 10<sup>-6</sup> M ZA at 30 hrs and 10<sup>-7</sup> M ZA at 56 hrs. **(B)** Proliferation of p63 knock-out cells was also impaired, as shown by a significant 22% decrease in the slope of their exponential growth phase when compared with that of scrambled controls. N = 3 per time-point, per treatment. (a) 10<sup>-5</sup> M ZA significance, (b) 10<sup>-6</sup> M ZA significance, (c) 10<sup>-7</sup> M ZA significance. Results are reported as mean ± standard deviation.

**Appendix Table 1.** Summary of Known Patient Data from Analyzed Biopsy Specimens

| Patient | Group   | Age (yrs) | Gender | Specimen Diagnosis     | Biopsy Site        | Bisphosphonate | Known Systemic Conditions |
|---------|---------|-----------|--------|------------------------|--------------------|----------------|---------------------------|
| 1       | Control | 65        | M      | Bony sequestrum        | Alveolar ridge     |                |                           |
| 2       | Control | 57        | M      | Non-specific ulcer     | Mandibular gingiva |                |                           |
| 3       | Control | 65        | M      | Traumatic ulcer        | Hard palate        |                |                           |
| 4       | Control | 78        | M      | Traumatic ulcer        | Alveolar ridge     |                |                           |
| 5       | Control | 54        | F      | Granulomatous reaction | Alveolar ridge     |                |                           |
| 6       | Control | 54        | F      | Ulcer and exposed bone | Retromolar pad     |                |                           |
| 7       | Control | 65        | M      | Bony sequestrum        | Alveolar ridge     |                |                           |
| 8       | Control | 48        | F      | Bony sequestrum        | Mandibular gingiva |                |                           |
| 9       | Control | 84        | F      | Bony sequestrum        | Alveolar ridge     |                |                           |
| 10      | IV BP   | 82        | M      | ONJ                    | Alveolar ridge     | Zometa®        | Prostate cancer           |
| 11      | IV BP   | 65        | M      | ONJ                    | Alveolar ridge     | Zometa®        | Multiple myeloma          |
| 12      | IV BP   | 67        | F      | ONJ                    | Maxilla NOS        | Zometa®        | Multiple myeloma          |
| 13      | IV BP   | 55        | F      | ONJ                    | Alveolar ridge     | Zometa®        | Breast cancer             |
| 14      | IV BP   | 78        | M      | ONJ                    | Alveolar ridge     | Zometa®        |                           |
| 15      | Oral BP | 70        | F      | ONJ                    | Alveolar ridge     | Oral NOS       |                           |
| 16      | Oral BP | 81        | F      | ONJ                    | Alveolar ridge     | Oral NOS       |                           |
| 17      | Oral BP | 65        | F      | ONJ                    | Alveolar ridge     | Fosamax®       |                           |
| 18      | Oral BP | 67        | F      | ONJ                    | Alveolar ridge     | Fosamax®       |                           |
| 19      | Oral BP | 88        | F      | ONJ                    | Mandible NOS       | Fosamax®       |                           |

Known systemic conditions include those that were disclosed when the biopsy was submitted but do not represent a complete medical history. NOS: not otherwise specified.

**Appendix Table 2.** Patient Information Summary for Biopsies from Which Primary Oral Keratinocytes Were Derived

| Patient | Age (yrs) | Gender | Race      | Biopsy Site    |
|---------|-----------|--------|-----------|----------------|
| 1       | 38        | F      | Caucasian | Buccal mucosa  |
| 2       | 39        | M      | Caucasian | Alveolar ridge |
